# Supplementary material for: In silicoanalysis andin vivotests of the tuna dark muscle hydrolysate anti-oxidation effect
Source: Royal Society of Chemistry journal article supplement (doi:10.1039/c8ra00889b), 2018-01-01
Supplement: c8ra00889b1.pdf [file c8ra00889b1.pdf]

1 **In-silico analysis and in-vivo tests of the tuna dark muscle hydrolysate anti-**  
2 **oxidation effect**

3 Jiaojiao Han<sup>1</sup>, Shasha Tang<sup>1</sup>, Yanyan Li<sup>2</sup>, Wei Bao<sup>1</sup>, Haitao Wan<sup>1</sup>, Chenyang Lu<sup>1</sup>, Jun  
4 Zhou<sup>1\*</sup>, Ye Li<sup>1</sup>, Lingzhi Cheong<sup>1</sup>, Xiurong Su<sup>1\*</sup>

5 <sup>1</sup> School of Marine Science, Ningbo University, Ningbo, China

6 <sup>2</sup> College of Agriculture and Life Sciences, Cornell University, Ithaca, USA

7

8 **\* Corresponding author:**

9 **Prof., Xiurong Su**

10 School of Marine Science, Ningbo University, 818 Fenghua Road, Ningbo, China

11 Tel/Fax: +86 574 87608368. E-mail address: [suxiurong\\_public@163.com](mailto:suxiurong_public@163.com)

12

13 **Dr. Jun Zhou**

14 School of Marine Science, Ningbo University, 818 Fenghua Road, Ningbo, China

15 Tel/Fax: +86 574 87608368. E-mail address: [zhoujun1@nbu.edu.cn](mailto:zhoujun1@nbu.edu.cn)

16

17

18

19

20

21

22

23 **Method**

24 **Single factor experiment**

25 The degree of hydrolysis (DH) is defined as the percentage of nitrogen in the  
26 supernatant:

27 
$$DH (\%) = \frac{N_s}{N_{all}} * 100\%$$

28 where  $N_s$  is the nitrogen content in the supernatant, and  $N_{all}$  is the total nitrogen  
29 content in the sample with same weight.

30 The deposition rate (DR) is defined as the percentage of sample dry weight in the  
31 precipitate:

32 
$$DR (\%) = \frac{Dry\ Weight_p}{Dry\ Weight_{sample}} * 100\%$$

33 where  $Dry\ Weight_p$  is the dry weight of the precipitate, and  $Dry\ Weight_{sample}$  is the  
34 dry weight of the sample.

35 The DH and DR are measured as described below: 10 g dark muscle, a certain  
36 amount water and enzyme were added in jacketed 250 mL glass vessels equipped with  
37 a stirrer (IKA C-MAG HS 7, IKA, Germany) and connected to a circulating water bath  
38 (IKA ICC basic, IKA, Germany) to control the temperature. After enzymolysis, the  
39 mixture was heated in a boiling water for 10 min to inactive the enzyme, and  
40 subsequently centrifuged at 4000 rpm at 4°C for 10 min after cool to the room  
41 temperature. The DH was estimated according to the method of Anwar Noman<sup>1</sup> with  
42 some modifications. The nitrogen content was determined as the Kjeldahl method  
43 discribed<sup>2</sup>. The residual solid particles after centrifugation and the sample with sample  
44 weight (10 g) were heated under 80 °C for 48 h until the dry weight data reached stable.

45 The DH and DR were used as the indexes for optimal enzymatic hydrolysis  
46 screening, including enzyme type, enzyme concentration, enzymolysis time, enzyme  
47 ratio, enzymolysis temperature and the solid-to-liquid ratio. The enzyme was selected  
48 among animal protein hydrolase (200,000 U/g), alkaline protease (200,000 U/g),  
49 flavourzyme (200,000 U/g) and trypsin (4000 U/g) (Guangxi Nanning Pang Bo  
50 Biological Engineering Co., Ltd, Nanning, China).

51

## 52 **Response surface design**

53 Based on the single factor experiment, the optimal conditions of each factor were  
54 used as experimental factors. The DH and DR were used as the response values. The  
55 Box-Behnken central combination principle was used to design and optimize the  
56 experiment to determine the optimum conditions of enzymatic hydrolysis. In addition,  
57 the three factors and three levels were designed to optimize the hydrolysis conditions  
58 of dark muscle.

59

## 60 **Single factor experiment results**

61 In the single factor experiment, DH and DR indexes are used as the indexes to  
62 measure the enzymatic hydrolysis efficiency, the combination with the highest DH and  
63 the lowest DR is regarded as the most efficient one. In this study, the optimal  
64 enzymolysis condition is: the optimal enzyme formula is trypsin and alkaline at the  
65 ratio of 2:1, the hydrolysis time was 4 h, the enzyme concentration was 3%, the heat  
66 temperature was 55 °C and the solid-liquid ratio was 1:9 (Figure 1).

67

## 68 **Optimization by response surface design**

69 According to the single factor experiment, three individual parameters and three  
70 levels in the Box-Behnken design, the hydrolysis degree was chosen as the response  
71 value, and the hydrolysis temperature (A), hydrolysis time (B) and content of enzyme  
72 (C) were selected to respond to the surface experiment (Supplementary Table S1).  
73 ANOVA of the data was performed using Design Expert 8.0.5 software. The second-  
74 order polynomial equation (Eq (3) and (4)) obtained by fitting the three factors was as  
75 follows:

$$76 \quad Y1 = 60.56 + 1.125 * A - 0.045 * B + 0.31 * C + 0.3775 * A * B + 0.1425 * A * \\ 77 \quad C + 0.9575 * B * C - 3.32125 * A^2 - 2.70125 * B^2 - 4.39125 * C^2 \quad (3)$$

$$78 \quad Y2 = 20.02667 - 2.2525 * A + 0.67625 * B - 0.53375 * C - 0.9375 * A * \\ 79 \quad B + 0.0975 * A * C - 1.115 * B * C + 5.544167 * A^2 + 4.101667 * B^2 + \\ 80 \quad 9.791667 * C^2 \quad (4)$$

81 where A, B, and C are all coded values.

82 The results of analysis of variance (ANOVA) for each response ( $P < 0.05$ ) and lack  
83 of fit analysis ( $P > 0.05$ ) are shown (Supplementary Table S2). The quadratic term  
84 coefficients ( $A^2$ ,  $B^2$ ,  $C^2$ ) were all significant on Y1 and Y2, and both had small P-values  
85 ( $P < 0.05$ ). The other terms' coefficients were not significant ( $P > 0.05$ ). Thus, the model  
86 can be used to predict the DH and the DR under different enzymolysis conditions. In  
87 the present study, three-dimensional (3D) response surface plots were generated using  
88 Design-Expert 8.0.5 as presented in Figure 2. The slope of the response surface 3D

89 image reflects the sensitivity of the response value to the factor.

90

91

92

93

94

95

96

97

98

99

100

101

102

103

104

105

106

107

108

109

110

111 **Supplementary Table S1.** Results of the response surface experiment

| Serial number | Code Value |    |    | Actual Value |      |      | Y1 (DH%) | Y2 (DR%) |
|---------------|------------|----|----|--------------|------|------|----------|----------|
|               | A          | B  | C  | t(°C)        | T(h) | E(%) |          |          |
| 1             | -1         | -1 | 0  | 50           | 3.5  | 3    | 53.29    | 30.58    |
| 2             | 1          | -1 | 0  | 60           | 3.5  | 3    | 55.13    | 28.36    |
| 3             | -1         | 1  | 0  | 50           | 4.5  | 3    | 53.19    | 32.86    |
| 4             | 1          | 1  | 0  | 60           | 4.5  | 3    | 56.54    | 26.89    |
| 5             | -1         | 0  | -1 | 50           | 4    | 2    | 51.66    | 38.59    |
| 6             | 1          | 0  | -1 | 60           | 4    | 2    | 53.28    | 33.48    |
| 7             | -1         | 0  | 1  | 50           | 4    | 4    | 52.13    | 37.05    |
| 8             | 1          | 0  | 1  | 60           | 4    | 4    | 54.32    | 32.33    |
| 9             | 0          | -1 | -1 | 55           | 3.5  | 2    | 54.6     | 32.05    |
| 10            | 0          | 1  | -1 | 55           | 4.5  | 2    | 51.85    | 36.58    |
| 11            | 0          | -1 | 1  | 55           | 3.5  | 4    | 53.17    | 33.49    |
| 12            | 0          | 1  | 1  | 55           | 4.5  | 4    | 54.25    | 33.56    |
| 13            | 0          | 0  | 0  | 55           | 4    | 3    | 60.12    | 20       |
| 14            | 0          | 0  | 0  | 55           | 4    | 3    | 60.81    | 20.01    |
| 15            | 0          | 0  | 0  | 55           | 4    | 3    | 60.75    | 21.03    |

112

113

114

115

116

117

118

119

120

121

122

123

124

125

126 **Supplementary TableS2.** Analysis of variance (ANOVA) for the second-order polynomial mode. \*,  $P < 0.05$ ; \*\*,  $P < 0.01$ .

| Source         | Mean squares | F value | <i>P</i> value | Source         | Mean squares | F value | <i>P</i> value |
|----------------|--------------|---------|----------------|----------------|--------------|---------|----------------|
| Y1             | 15.19        | 45.31   | 0.0003**       | Y2             | 58.67        | 128.19  | < 0.0001**     |
| A              | 10.12        | 30.19   | 0.0027**       | A              | 40.59        | 88.68   | 0.0002**       |
| B              | 0.02         | 0.05    | 0.8347         | B              | 3.66         | 7.99    | 0.0368*        |
| C              | 0.77         | 2.29    | 0.1904         | C              | 2.28         | 4.98    | 0.0760         |
| AB             | 0.57         | 1.70    | 0.2491         | AB             | 3.52         | 7.68    | 0.0393*        |
| AC             | 0.08         | 0.24    | 0.6435         | AC             | 0.04         | 0.08    | 0.7847         |
| BC             | 3.67         | 10.94   | 0.0213*        | BC             | 4.97         | 10.86   | 0.0216*        |
| A <sup>2</sup> | 40.73        | 121.45  | 0.0001**       | A <sup>2</sup> | 113.49       | 247.95  | < 0.0001**     |
| B <sup>2</sup> | 26.94        | 80.34   | 0.0003**       | B <sup>2</sup> | 62.12        | 135.71  | < 0.0001**     |
| C <sup>2</sup> | 71.20        | 212.31  | < 0.0001**     | C <sup>2</sup> | 354.01       | 773.42  | < 0.0001**     |
| Residual       | 0.34         |         |                |                | 0.46         |         |                |
| Lack of Fit    | 0.46         | 3.16    | 0.2497         |                | 0.76         | 531.56  | 0.0019         |
| Pure Error     | 0.15         |         |                |                | 0.0014       |         |                |
| R-Squared      | 0.9879       |         |                |                | 1.00         |         |                |
| C.V. %         | 1.05         |         |                |                | 2.23         |         |                |

**Supplementary Table S3.** Peptides measured by MALDI-TOF/TOF

| Polypeptide sequence | Polypeptide<br>Expected Mr | Polypeptide<br>Calculated Mr | Polypeptide<br>score | Relative<br>Intensity% | Protein Description                                   |
|----------------------|----------------------------|------------------------------|----------------------|------------------------|-------------------------------------------------------|
| KEFT                 | 523.0918                   | 523.2642                     | 22                   | 4.24                   | Hemoglobin subunit alpha                              |
| EEASA                | 505.0969                   | 505.202                      | 28                   | 3.93                   | GnRH3                                                 |
| RYDD                 | 567.081                    | 567.2289                     | 17                   | 3.43                   | somatolactin                                          |
| VEKE                 | 503.1008                   | 503.2591                     | 31                   | 1.62                   | gonadotropin hormone LH beta subunit                  |
| TIRM                 | 519.1044                   | 519.2839                     | 28                   | 1.47                   | GnRH3                                                 |
| FPRM                 | 549.0809                   | 549.2733                     | 19                   | 1.34                   | cytochrome oxidase subunit 1, partial (mitochondrion) |
| PVALSCHC             | 828.1918                   | 828.3622                     | 31                   | 0.11                   | gonadotropin hormone LH beta subunit                  |
| MIGGFGNW             | 880.2256                   | 880.3902                     | 19                   | 0.74                   | cytochrome oxidase subunit 1, partial (mitochondrion) |
| YRDFYYKT             | 1154.5598                  | 1154.5396                    | 31                   | 0.07                   | gonadotropin hormone LH beta subunit                  |
| PPCQLINQTVS          | 1198.5956                  | 1198.6016                    | 31                   | 0.08                   | gonadotropin hormone LH beta subunit                  |
| TPAAAFQLPPCQ         | 1242.6197                  | 1242.6067                    | 31                   | 0.08                   | gonadotropin hormone LH beta subunit                  |
| QQGIWAVSLWP          | 1283.4864                  | 1283.6663                    | 17                   | 0.05                   | somatolactin                                          |
| PTVTYPVALSCH         | 1286.6535                  | 1286.6329                    | 31                   | 0.08                   | gonadotropin hormone LH beta subunit                  |
| VINDSSHFNR           | 1302.6432                  | 1302.5953                    | 28                   | 0.06                   | GnRH3                                                 |
| QHVCTYRDFY           | 1330.6774                  | 1330.5765                    | 31                   | 0.07                   | gonadotropin hormone LH beta subunit                  |
| PVALSCHCGRCAM        | 1346.6775                  | 1346.5716                    | 31                   | 0.06                   | gonadotropin hormone LH beta subunit                  |
| TTICSGHCITKDP        | 1374.6997                  | 1374.6272                    | 31                   | 0.06                   | gonadotropin hormone LH beta subunit                  |
| ITKALPIPSSKSEI       | 1482.7216                  | 1482.8657                    | 17                   | 0.04                   | somatolactin                                          |



130 **Supplementary Table S4.** Potential targets with relatively low fit value screened by  
 131 DS 2016.

| Name  | Pharmacophore Number | Pharmacophore                             | Fit Value | Biological function                                          |
|-------|----------------------|-------------------------------------------|-----------|--------------------------------------------------------------|
| RYDD  | 1AJJ-05              | Low-density lipoprotein receptor          | 2.65912   | regulation<br>hyperlipidemia                                 |
|       | 1m4d-09              | Aminoglycoside 2'-N-acetyltransferase     | 2.57746   | aminoglycoside 2'-N-acetyltransferase activity               |
|       | 2aio-01              | Metallo-beta-lactamase L1 type 3          | 2.50539   | beta-lactamase activity                                      |
|       | 3d9m-01              | Protein SCAF8                             | 2.31593   | RNA binding                                                  |
|       | 2orj-04              | Pulmonary surfactant-associated protein D | 2.26166   | carbohydrate binding                                         |
| KEFT  | 1AJJ-04              | Low-density lipoprotein receptor          | 2.6315    | regulation<br>hyperlipidemia                                 |
|       | 1jj7-06              | Antigen peptide transporter 1             | 2.62846   | ADP binding                                                  |
|       | 2dq7-1               | Tyrosine-protein kinase Fyn               | 2.56675   | ATP binding                                                  |
|       | 2orj-04              | Pulmonary surfactant-associated protein D | 2.45056   | carbohydrate binding                                         |
|       | 3cyq-01              | Motility protein B                        | 1.99232   | archaeal or bacterial-type flagellum-dependent cell motility |
| EEASA | 1amw-03              | ATP-dependent molecular chaperone HSP82   | 2.5989    | ATPase activity, coupled                                     |
|       | 2gz7-08              | Orf1a polyprotein                         | 2.52791   | cysteine-type endopeptidase activity                         |
|       | 3cyq-01              | Motility protein B                        | 2.50415   | archaeal or bacterial-type flagellum-dependent cell motility |
|       | 2orj-04              | Pulmonary surfactant-associated protein D | 2.25684   | carbohydrate binding                                         |
|       | 1jj7-09              | Antigen peptide transporter 1             | 2.23903   | ADP binding                                                  |

132  
 133  
 134  
 135  
 136  
 137  
 138  
 139  
 140

141 Reference

- 142 1. A. Noman, Y. Xu, W. Q. Al-Bukhaiti, S. M. Abed, A. H. Ali, A. H. Ramadhan  
143 and W. Xia, Influence of enzymatic hydrolysis conditions on the degree of  
144 hydrolysis and functional properties of protein hydrolysate obtained from  
145 Chinese sturgeon ( *Acipenser sinensis* ) by using papain enzyme, *Process*  
146 *Biochemistry*, 2018.
- 147 2. Kjeldahl Method, *Encyclopedia of Genetics Genomics Proteomics &*  
148 *Informatics*, 2008, 1063-1063.
- 149
